# Supplementary material for: Phase I Trial of a Multi-Peptide COVID-19 Vaccine for the Induction of SARS-CoV-2 T-Cell Immunity
Source: Research Square preprint supplement (doi:10.21203/rs.3.rs-820910/v1), 2021-08-20
Supplement: Supplementary file 1 [file 76d6b265f1329644846fd379.docx]

Supplementary Appendix to Manuscript Entitled

**Phase I Trial of a Multi-Peptide COVID-19 Vaccine**

**for the Induction of SARS-CoV-2 T-Cell Immunity**

**Table of Contents**

**Supplementary Methods** 2

Detailed inclusion and exclusion criteria for trial participants 2

Stopping criteria and statistical considerations 2

SARS-CoV-2 convalescent individuals 4

IFN- ELISPOT assay *ex vivo* or following 12-day *in vitro* expansion 4

Intracellular cytokine, cell surface marker, and tetramer staining 6

Software and statistical analysis 7

**Supplementary Study Results** 8

**Supplementary Figures** 9

Figure S1: C Gating strategy for flow cytometry-based evaluation of surface marker

and intracellular cytokine staining 9

**Supplementary Tables** 10

Table S1: CoVac-1 peptides and corresponding embedded HLA class I-restricted

Peptides 10

Table S2: Mutations of SARS-CoV-2 variants of concern 11

Table S3: Toxicity grading scale modified according to CTCAE V5.0 13

Table S4: Potential immune mediated conditions 14

Table S5: Adverse events of special interest (AESI) 15

Table S6: Characteristics of convalescents after SARS-CoV-2 infection 15

**References** 15

# Supplementary Methods

## **Detailed inclusion and exclusion criteria for trial participants**

Eligible participants were men or women aged 18-55 (Part I) or 56-80 years (Part II). In Part I, participants were free of clinically significant health problems. In Part II, participants with stable medical history were enrolled. Participants had to refrain from blood donations during the course of the study and be willing to minimize body fluid transmission to others for 7 days after vaccination. All participants had to adhere to adequate contraception methods until three months after vaccination.

Exclusion criteria comprised: pregnant or lactating females, participation in another clinical trial, treatment with immunosuppressive drugs, prior or current infection with SARS-CoV-2 (proven serologically or by PCR), known previous anaphylactic reaction to any component or hypersensitivity to any component of the CoVac-1 vaccine, relevant CNS pathology or other neurological disease, positivity for HIV or active hepatitis, lymphocyte count ≤1.000/µl, blood donation within 30 days, or administration of immunoglobulins or blood products within 120 days prior to study inclusion, diabetes type II, chronic lung disease requiring drug treatment, increased liver enzymes (≥2.5 x upper limit of normal), renal failure (GFR<60ml/min/1.73m2), serious cardiovascular disease, sickle cell anemia, obesity (defined by age adjusted body mass index), or preexisting auto-immune disease except for Hashimoto thyroiditis and mild psoriasis.

## **Stopping criteria and statistical considerations**

This clinical trial had a predefined stopping rule: Observation of one serious adverse event (SAE) associated with administration of CoVac-1. The sample size calculation of 36 participants for the trial was based on this stopping rule and determined to show that the incidence of SAE associated with administration of CoVac-1 does not exceed a predetermined rate of 5% (= P1). Safety of the CoVac-1 vaccine should be shown if no SAE (= P0) occurs in the study population. An evaluable sample size of 33 achieves 81.6% of power to detect a difference (P1 – P0) of 0.0499 using a one-sided exact test based on the binomial distribution with a target significance level of 0.05 (sample size determination using PASS). These results assume that the population proportion under the null hypothesis (P0) is ≤ 0.0001. Assuming a drop-out rate of 7.5% (percentage of subjects that are expected to be lost at random during the course of the study and for whom no response data concerning existence of SAE will be collected, *i.e.* will be treated as “missing”) the total number of 36 subjects should be enrolled in the study to achieve the threshold of 33 evaluable subjects.

Besides the predefined stopping rule, further holding rules were implemented:

- Local solicited adverse events (AEs): If more than 30% of injections are followed by grade ≥ 3 solicited swelling or pain or grade 4 erythema (first occurrence at any time after vaccination) and persisting at grade 3 (swelling or pain)/4 (erythema) for > 48 h to maximum 72 hours depending upon symptom severity and kinetics.
- Systemic solicited AEs: If more than 25% of injections are followed by grade 3 solicited systemic AE beginning within 3 days after injection (day of injection and 2 subsequent days) and persisting at grade ≥ 3 for > 48 h to maximum 72 hours depending upon symptom severity and kinetics.
- Unsolicited AEs: If more than 25% of volunteers develop a grade ≥ 3 unsolicited AE (including laboratory AE and physical observations) that is considered probably or definitely related to injection and persists at grade 3 for > 48 to maximum 72 hours depending upon symptom severity and kinetics.
- A suspected unexpected serious adverse drug reaction (SUSAR) occurs that is life-threatening or results in death.

If a holding rule is met, further recruitment is paused until review by the data safety monitoring board (DSMB). In addition, the DSMB reviewed the safety and immunogenicity data of the Part I of the clinical trial prior to proceeding to Part II.

## **SARS-CoV-2 convalescent individuals**

To delineate differences of SARS-CoV-2 immune responses in vaccinated participants to immune responses after natural infection, a reference group of COVID-19 convalescent individuals, described previously1,2, was used for comparison. SARS-CoV-2 infection was confirmed by real-time polymerase chain reaction (PCR) after nasopharyngeal swab. Sample collection for human COVID-19 convalescents (HCs, n = 52) was performed 16 – 52 days after positive PCR. In non-hospitalized convalescents, donor characteristics and COVID-19 symptoms were assessed by questionnaire. Details are provided in Table S5. Written informed consent was obtained in accordance with the Declaration of Helsinki protocol (local ethics committee at University Tübingen; project number: 179/2020/BO2).

Peripheral blood mononuclear cells (PBMCs) were isolated by density gradient centrifugation and were stored at -80°C.

## **IFN- ELISPOT assay *ex vivo* or following 12-day *in vitro* expansion**

For *in vitro* expansion, PBMCs were pulsed with CoVac-1 peptides1,2 (5 g/mL per peptide) and cultured for 12 days adding 20 U/mL interleukin-2 (IL-2, Novartis) on days 3, 5, and 7. Peptide-stimulated (*in vitro* expanded) or freshly thawed (*ex vivo*) PBMCs were analyzed by interferon (IFN)- enzyme-linked immunospot (ELISPOT) assay, as described previously.1 In brief, 2‑6 × 105 cells per well were incubated in 96-well ELISPOT plates coated with anti-IFN- antibody (clone 1-D1K, 2 g/mL, MabTech, Cat# 3420-3-250, RRID: AB_907283) with 1 µg/mL or 2.5 g/mL for embedded human leukocyte antigen (HLA) class I or HLA class II-restricted CoVac-1 peptides, respectively. PHA (Sigma-Aldrich) served as positive control. An irrelevant HLA-DR-restricted control peptide (ETVITVDTKAAGKGK, FLNA_HUMAN1669−1683) or 10% dimethyl sulfoxide (DMSO) in double-distilled water served as negative controls. After 24 h of incubation, spots were revealed with anti-IFN- biotinylated detection antibody (clone 7‑B6‑1, 0.3 g/mL, MabTech, Cat# 3420-6-250, RRID: AB_907273), ExtrAvidin-Alkaline Phosphatase (1:1,000 dilution, Sigma-Aldrich), and BCIP/NBT (5-bromo-4-chloro-3-indolyl-phosphate/nitro-blue tetrazolium chloride, Sigma-Aldrich). Spots were counted using an ImmunoSpot S6 analyzer (CTL). T-cell responses were considered positive if the mean spot count of the technical replicates was ≥ 3-fold higher than the mean spot count of the negative control and defined as CoVac-1-induced if the mean spot count post vaccination was ≥ 2-fold higher than the respective spot count on day 1. The intensity of T‑cell responses is depicted as calculated spot counts, which represent the mean spot count normalized to 5 x 105 cells minus the normalized mean spot count of the respective negative control.

**Intracellular cytokine, cell surface marker, and tetramer staining**

Peptide-specific T cells were characterized by cell surface marker and intracellular cytokine staining (ICS) as previously described.1 In brief, PBMCs were incubated with the CoVac-1 vaccine peptide pool or the negative control peptide, Brefeldin A (Sigma-Aldrich), and GolgiStop (BD Biosciences). PMA and ionomycin (Sigma-Aldrich) served as positive control. Staining was performed using Cytofix/Cytoperm solution (BD), Aqua live/dead (1:400 dilution, Invitrogen), APC/Cy7 anti-human CD4 (1:100 dilution, BioLegend, Cat# 300518, RRID: AB_314086), PE/Cy7 anti-human CD8 (1:400 dilution, Beckman Coulter, Cat# 737661, RRID: AB_1575980), Pacific Blue anti-human tumor necrosis factor (TNF, 1:120 dilution, BioLegend, Cat# 502920, RRID: AB_528965), FITC anti-human CD107a (1:100 dilution, BioLegend, Cat# 328606, RRID: AB_1186036), APC anti-human IL-2 (1:40 dilution, BioLegend, Cat# 500309, RRID: AB_315096), and PE anti-human IFN- monoclonal antibodies (1:200 dilution, BioLegend, Cat# 506507, RRID: AB_315440). T-cell responses were considered positive if the detected frequency of cytokine-positive CD4+ or CD8+ T cells was ≥ 3-fold higher than the frequency in the negative control. Frequency of cytokine-positive cells was corrected for background by subtraction of the respective negative control values. Negative values were set to zero. Results were defined as induced response if the frequency of cytokine-positive cells was ≥ 2-fold higher than the respective frequency on day 1. The frequency of CoVac-1-embedded peptide-specific CD8+ T cells was determined by PE/Cy7 anti-human CD8 and HLA:peptide tetramer-PE staining. HLA-matched control cells stained with the tetramer of interest were used to determine the background. For evaluation we applied the same criteria used for ICS. All samples were analyzed on a FACS Canto II cytometer (BD). The gating strategy applied for the analyses of flow cytometry-acquired data is provided in Supplementary Fig. S1.

## **Software and statistical analysis**

Flow cytometric data was analyzed using FlowJo 10.7.1 (BD). Graphs were plotted using Rstudio and GraphPad Prism 9.0.0. Statistical analyses were conducted using GraphPad Prism 9.0.0 and SAS Version 9.4.

In case an AE, even if determined by definition as solicited, was clearly caused by another reason, the investigator judged the event as unrelated to CoVac-1. These unrelated AEs are displayed as unsolicited AEs (Extended Data Table 1).

# Supplementary Study Results

## **Safety laboratory assessment**

Safety laboratory AEs were graded according to a CTCAE V5.0 grading scale. Abnormal laboratory parameters were assessed by the investigators for clinical significance. No clinically significant laboratory deviation was reported. If normal at baseline, deviations from normal range were reported for six parameters (hemoglobulin, creatinine, alanine transaminase, aspartate transaminase, fibrinogen, and C-reactive protein). The most frequent deviation was reported for C-reactive protein in 11 participants (31%). 3 participants were reported to have grade 1 elevated liver enzymes. No laboratory abnormality met grade 2 or higher toxicity.

## **Unsolicited adverse events**

There were 58 unsolicited AEs reported, none met the definition of a SAE (Extended Data Table 1). Of those, 81% were mild in severity, one of which was ruled as related to vaccination (herpes simplex reactivation in one subject of Part II), and 17% were moderate, one of which was ruled as related to vaccination (shingles in one subject of Part II). Only one (2%) severe unsolicited AE occurred (hypertension). In total, 3% AEs were judged as related to vaccination.

# Supplementary Figures


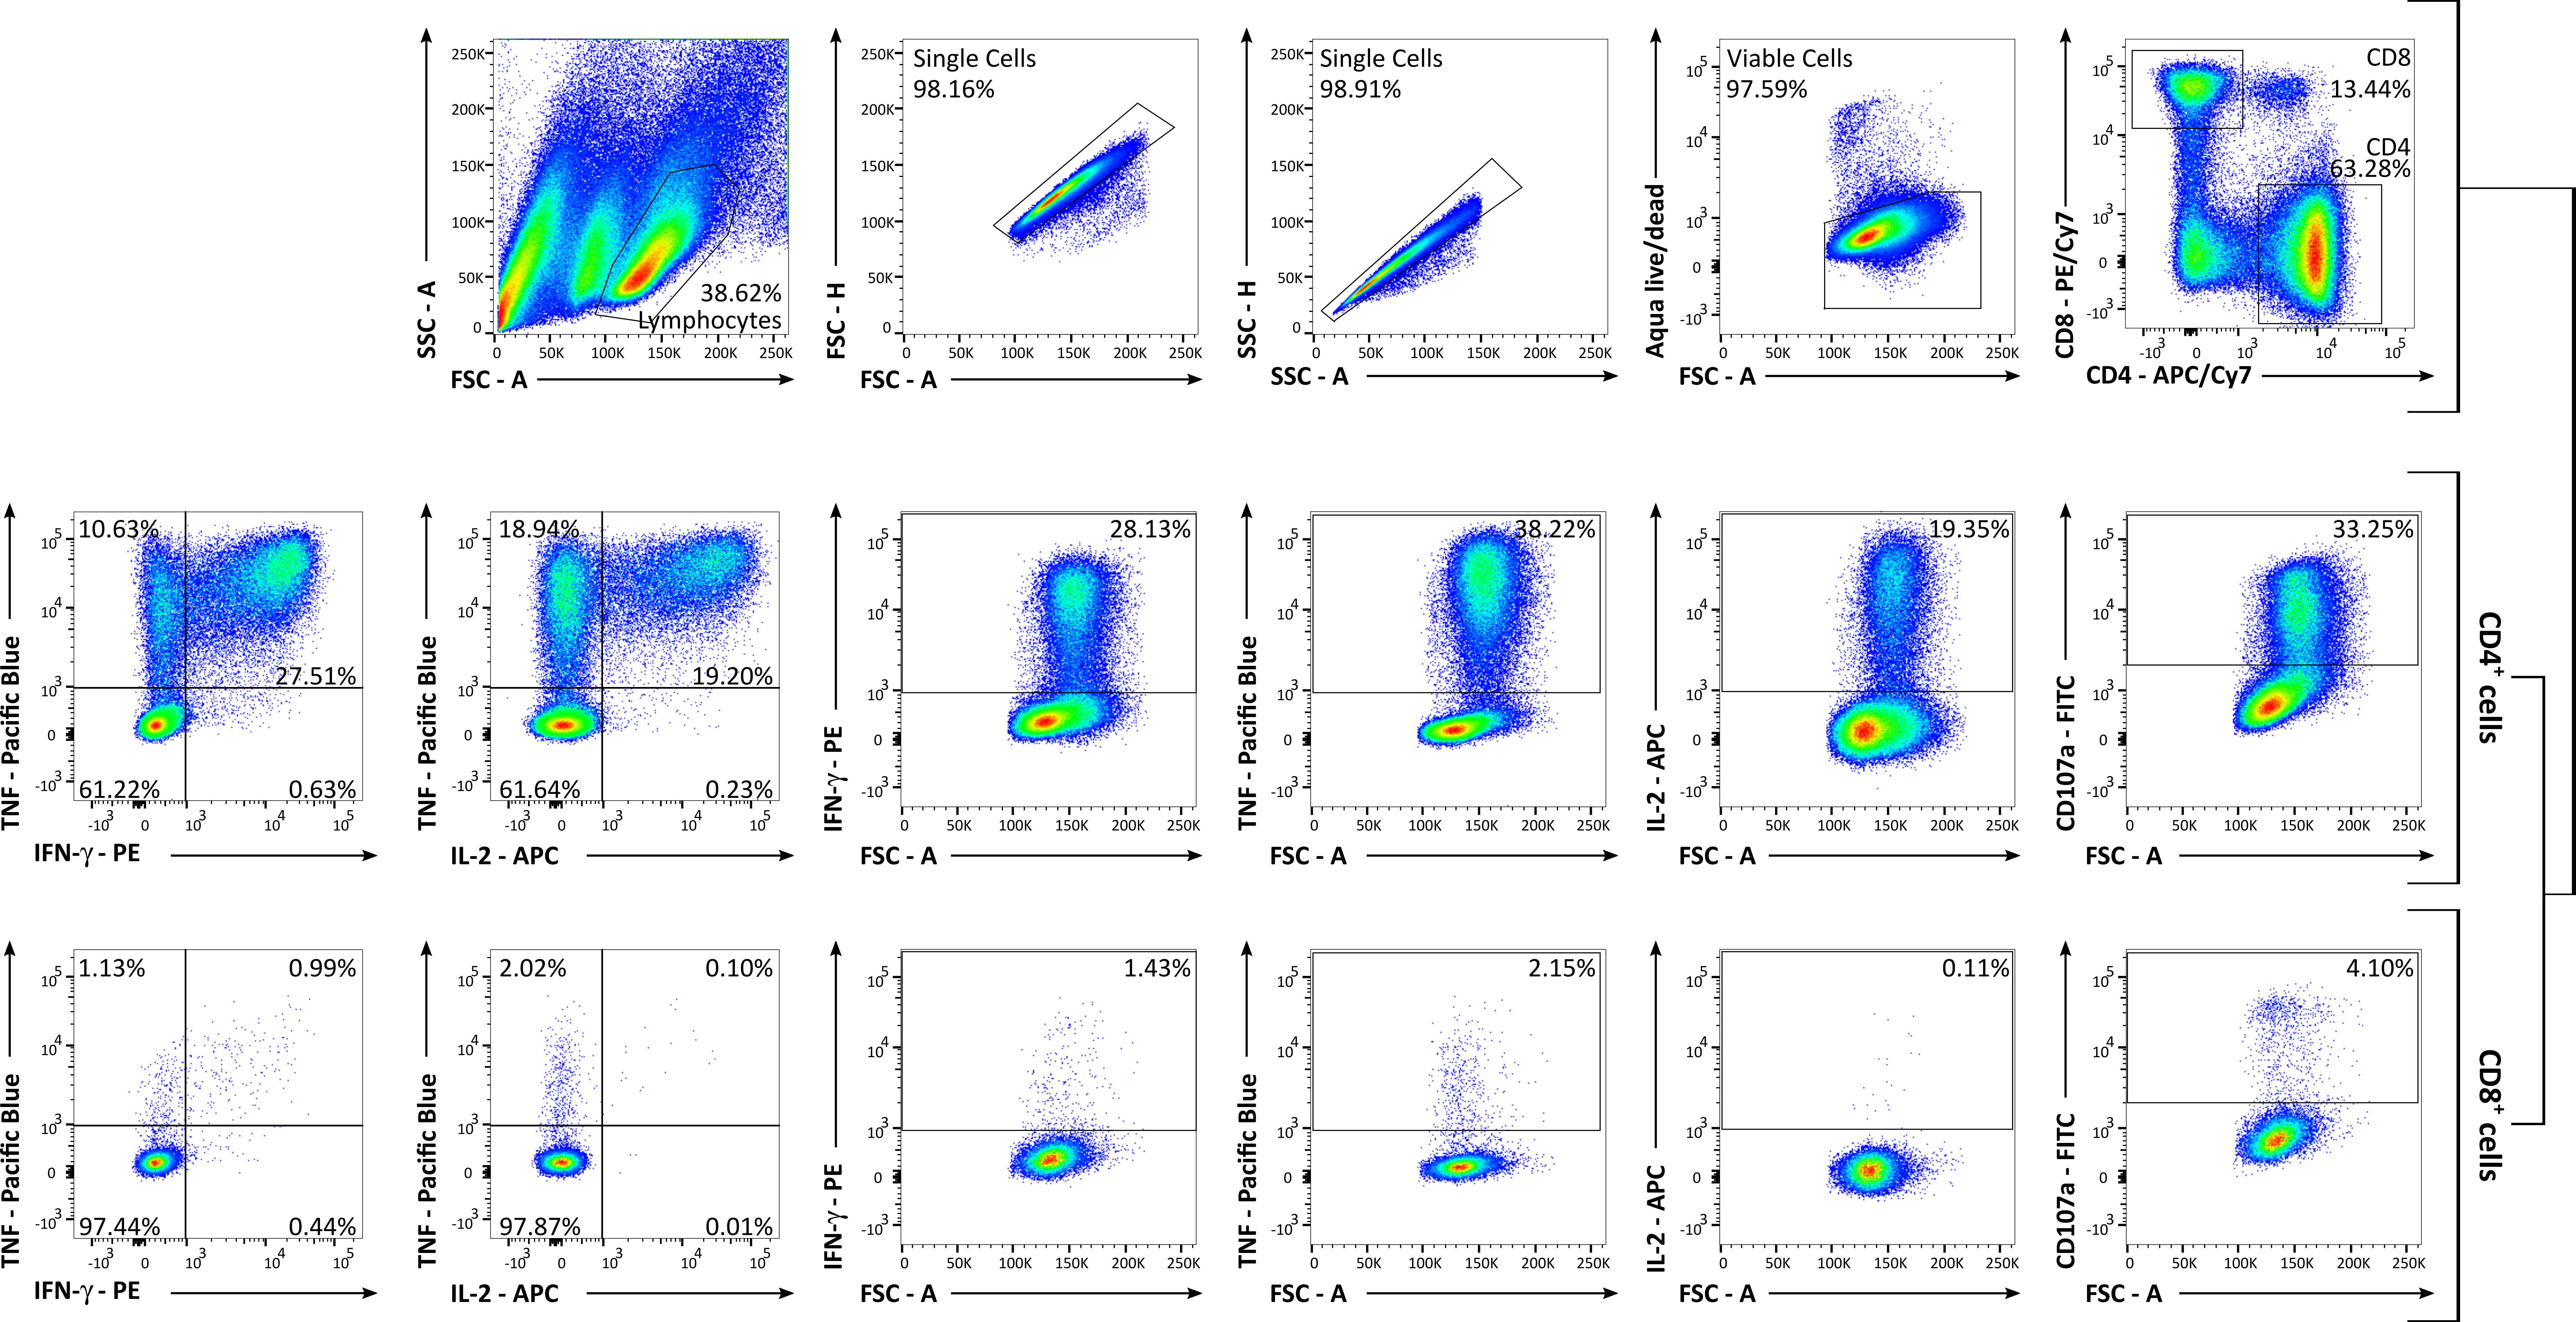


**Supplementary Figure S1: Gating strategy for flow cytometry-based evaluation of surface marker and intracellular cytokine staining.** Representative example showing the gating strategy for the evaluation of flow cytometry-acquired surface marker and intracellular cytokine staining data. The first gate identifies the lymphocytes (FSC-A vs. SSC-A), which are further gated for single cells (FSC-A vs. FSC-H and SSC-A vs. SSC-H) and viable cells (FSC-A vs. Aqua live/dead). Populations of CD4+ and CD8+ T cells (CD4-APC/Cy7 vs. CD8-PE/Cy7) are analyzed separately for different cytokines (FSC-A vs. IFN--PE; FSC-A vs. TNF-Pacific Blue; FSC‑A vs. IL-2-APC; IFN--PE vs. TNF-Pacific Blue; IL-2-APC vs. TNF-Pacific Blue) and the degranulation marker CD107a (FSC-A vs. CD107a-FITC). This gating strategy was applied for the data presented in Fig. 2D and Extended Data Fig. 4 and 5C.

# Supplementary Tables

## **Supplementary Table S1:** CoVac-1 peptides and corresponding embedded HLA class I-restricted peptides.

| **Peptide ID** | **Sequence** | **Protein** | **Protein class** | **HLA restriction** | **Position** | **Embedded peptide ID** | **Embedded peptide sequence** | **HLA restriction of embedded peptides** |
| --- | --- | --- | --- | --- | --- | --- | --- | --- |
| P1_nuc | ASWFTALTQHGKEDL | ORF9 nuc | structural | DRB1*04, DRB1*11 | 50-64 | P1_A*03 | FTALTQHGK | A*03, A*11 |
| P2_nuc | LLLLDRLNQLESKMS | ORF9 nuc | structural | DRB1*04, DRB1*15 | 221-235 | P2_A*02a | LLLLDRLNQL | A*02 |
| P2_A*02b | LLLDRLNQL | A*02 |
| P3_spi | ITRFQTLLALHRSYL | ORF2 spi | structural | DRB1*01 | 235-249 | P3_C*07 | TRFQTLLAL | C*07 |
| P3_B*15 | TLLALHRSY | B*15 |
| P3_A*02 | LLALHRSYL | A*02 |
| P4_env | FYVYSRVKNLNSSRV | ORF4 env | structural | DRB1*04, DRB1*11 | 56-70 | P4_A*24 | FYVYSRVKNL | A*24 |
| P4_A*03 | RVKNLNSSR | A*03 |
| P5_mem | LSYYKLGASQRVAGD | ORF5 mem | structural | DRB1*04, DRB1*07 | 176-190 | - | - | - |
| P6_ORF8 | SKWYIRVGARKSAPL | ORF8 | accessory | DRB1*01, DRB1*11 | 43-57 | - | - | - |

Abbreviations: ID, identification; nuc, nucleocapsid protein; spi, spike protein; env, envelope protein; mem, membrane protein; no, number.

## **Supplementary Table S2:** Mutations of SARS-CoV-2 variants of concern.

| **Protein** | **Position** | **Mutation** | **B.1.1.7-Alpha** | **B.1.351-Beta** | **P.1-Gamma** | **B.1.617.2-Delta** |
| --- | --- | --- | --- | --- | --- | --- |
| ORF1 | 265 | T265I |  | x |  |  |
| 1,001 | T1001I | x |  |  |  |
| 1,188 | S1188L |  |  | x |  |
| 1,567 | T1567I |  |  |  | x |
| 1,655 | K1655N |  | x |  |  |
| 1,708 | A1708D | x |  |  |  |
| 1,795 | K1795Q |  |  | x |  |
| 2,230 | I2230T | x |  |  |  |
| 2,799 | H2799Y |  | x |  |  |
| 2,900 | S2900L |  | x |  |  |
| 3,353 | K3353R |  | x |  |  |
| 3,646 | T3646A |  |  |  | x |
| 3,655 | M3655I |  | x |  |  |
| 3,675 | SGF3675-3677del | x |  | x |  |
| 4,715 | P4715L |  | x |  | x |
| 5,530 | G5530C |  |  |  | x |
| 5,753 | M5753I |  |  |  | x |
| 5,912 | T5912I |  | x |  |  |
| 6,711 | K6711R |  |  |  | x |
| 6,713 | S6713A |  |  |  | x |
| ORF2 spi | 18 | L18F |  | x | x |  |
| 19 | T19R |  |  |  | x |
| 20 | T20N |  |  | x |  |
| 26 | P26S |  |  | x |  |
| 69 | HV69-70del | x |  |  |  |
| 80 | D80A |  | x |  |  |
| 95 | T95I |  |  |  | x |
| 138 | D138Y |  |  | x |  |
| 142 | G142D |  |  |  | x |
| 144 | Y144del | x |  |  |  |
| 154 | E154K |  |  |  | x |
| 157 | FR157-158del |  |  |  | x |
| 190 | R190S |  |  | x |  |
| 215 | D215G |  | x |  |  |
| **242** | **L242H** |  | **x** |  |  |
| **246** | **R246I** |  | **x** |  |  |
| 417 | K417T |  |  | x |  |
| 417 | K417N |  | x |  |  |
| 478 | T478K |  |  |  | x |
| 452 | L452R |  |  |  | x |
| 484 | E484Q |  |  |  | x |
| 484 | E484K |  | x | x |  |
| 501 | N501Y | x | x | x |  |
| 570 | A570D | x |  |  |  |
| 614 | D614G |  | x |  | x |
| 655 | H655Y |  |  | x |  |
| 681 | P681H | x |  |  |  |
| 681 | P681R |  |  |  | x |
| 701 | A701V |  | x |  |  |
| 716 | T716I | x |  |  |  |
| 950 | D950N |  |  |  | x |
| 982 | S982A | x |  |  |  |
| 1,027 | T1027I |  |  | x |  |
| 1,071 | Q1071H |  |  |  | x |
| 1,118 | D1118H | x |  |  |  |
| ORF3 | 26 | S26L |  |  |  | x |
| 57 | Q57H |  | x |  |  |
| 171 | S171L |  | x |  |  |
| ORF4 env | 71 | P71L |  | x |  |  |
| ORF5 mem | 82 | I82S |  |  |  | x |
| ORF7a | 43 | N43Y |  |  |  | x |
| 82 | V82A |  |  |  | x |
| 120 | T120I |  |  |  | x |
| ORF8 | 27 | Q27* | x |  |  |  |
| **52** | **R52I** | **x** |  |  |  |
| 73 | Y73C | x |  |  |  |
| 92 | E92K |  |  | x |  |
| 121 | I121L |  | x |  |  |
| ORF9 nuc | 3 | D3L | x |  |  |  |
| 80 | P80R |  |  | x |  |
| 203 | R203M |  |  |  | x |
| 205 | T205I |  | x |  |  |
| **235** | **S235F** | **x** |  |  |  |
| 377 | D377Y |  |  |  | x |
| ORF9c | 52 | L52F |  | x |  |  |

List of variant-defining and -associated mutations included in the four SARS-CoV-2 variants of concern (B.1.1.7–Alpha, B.1.351–Beta, P.1–Gamma, B.1.617.2–Delta including mutations of B.1.617). Mutations marked in bold affect CoVac-1 peptides. Abbreviations: nuc, nucleocapsid protein; spi, spike protein; env, envelope protein; mem, membrane protein; no, number; ORF, open reading frame.

## **Supplementary Table S3:** Toxicity grading scale modified according to CTCAE V5.0.

| **Local solicited AEs** | **CTCAE Term** | **Grade 0**  **(normal)** | **Grade 1**  **(mild)** | **Grade 2**  **(moderate)** | **Grade 3**  **(severe)** | **Grade 4**  **(life-threatening)** |
| --- | --- | --- | --- | --- | --- | --- |
| **Erythema** | Injection site reaction | < 25 mm | 25 - 50 mm | 51 - 100 mm | > 100 mm | Life-threatening consequences:  urgent intervention indicated |
| **Swelling** | Injection site reaction | < 25 mm | 25 - 50 mm | 51 - 100 mm | > 100 mm | Necrosis |
| **Pain** | Injection site reaction | None | Tenderness with or without associated symptoms | Interferes with activity | Prevents daily activity | Life-threatening consequences:  urgent intervention indicated  emergency room visit or hospitalization |
| **Induration/**  **granuloma** | Injection site reaction | None | 25 - 50 mm | 51 - 100 mm | > 100 mm | Life-threatening consequences:  urgent intervention indicated |
| **Ulceration** | Injection site reaction | None | Combined area  of ulcers < 1 cm | Combined area  of ulcers 1 - 2 cm | Combined area of ulcers > 2 cm | Necrosis |

Abbreviations: AE, adverse event; CTCAE, Common Terminology Criteria for Adverse Events.

## **Supplementary Table S4:** Potential immune mediated conditions3.

| **Neuroinflammatory disorders** | **Musculoskeletal disorders** | **Skin disorders** | **Liver disorder** | **Gastrointestinal disorders** | **Metabolic & endocrine disorders** | **Vasculitides** | **Others** |
| --- | --- | --- | --- | --- | --- | --- | --- |
| Cranial nerve inflammatory disorders, including paralyses/paresis (e.g., Bell’s palsy) | Systemic lupus erythematosus | Psoriasis | Autoimmune hepatitis | Crohn’s disease | Autoimmune thyroiditis including Hashimoto thyroiditis | Large vessels vasculitis including: giant cell arteritis such as Takayasu’s arteritis and temporal arteritis | Autoimmune haemolytic anaemia |
| Acute disseminated encephalomyelitis including site-specific variants: encephalitis, encephalomyelitis, myelitis, myeloradiculoneuritis, cerebellitis | Systemic sclerosis (with limited or diffuse cutaneous involvement) | Vitiligo | Primary biliary cirrhosis | Ulcerative colitis | Grave’s or Basedow’s disease |  | Autoimmune thrombocytopenia |
| Multiple sclerosis | Dermatomyositis | Erythema nodosum | Primary sclerosing cholangitis | Ulcerative proctitis | Diabetes mellitus type I |  | Antiphospholipid syndrome |
| Transverse myelitis | Polymyositis |  | Autoimmune cholangitis. | Celiac disease | Addison’s disease |  | Pernicious anaemia |
| Optic neuritis | Anti-synthetase syndrome | Cutaneous lupus erythematosus |  |  |  |  | Raynaud’s phenomenon |
| Narcolepsy | Rheumatoid arthritis | Alopecia areata |  |  |  |  | Uveitis |
|  | Juvenile chronic arthritis including Still’s disease | Lichen planus |  |  |  |  | Autoimmune myocarditis/cardiomyopathy |
|  | Polymyalgia rheumatica | Sweet’s syndrome |  |  |  |  | Sarcoidosis |
|  | Psoriatic arthropathy | Morphoea |  |  |  |  | Stevens-Johnson syndrome |
|  | Relapsing polychondritis |  |  |  |  |  | Sjögren’s syndrome |
| Myasthenia gravis including Lambert-Eaton myasthenic syndrome | Mixed connective tissue disorder |  |  |  |  |  | Idiopathic pulmonary fibrosis |
|  |  |  |  |  |  |  | Goodpasture syndrome |
| Immune mediated peripheral neuropathies and plexopathies, (including Guillain-Barré syndrome, Miller Fisher syndrome and other variants, chronic inflammatory demyelinating polyneuropathy, multifocal motor neuropathy and polyneuropathies associated with monoclonal gammopathy | Spondyloarthritis, including ankylosing spondylitis, reactive arthritis  (Reiter’s Syndrome) and undifferentiated spondyloarthritis | Autoimmune bullous skin diseases including pemphigus, pemphigoid and dermatitis herpetiformis |  |  |  | Medium sized and/or small vessels vasculitis including:  polyarteritis nodosa, Kawasaki’s disease, microscopic polyangiitis, Wegener’s granulomatosis, Churg–Strauss syndrome (allergic granulomatous angiitis), Buerger’s disease  (thromboangiitis obliterans), necrotising vasculitis and  anti-neutrophil cytoplasmic antibody (ANCA) positive vasculitis (type unspecified), Henoch-Schonlein purpura, Behcet’s syndrome, leukocytoclastic vasculitis | Autoimmune glomerulonephritis including IgA nephropathy,  glomerulonephritis rapidly progressive, membranous glomerulonephritis,  membranoproliferative glomerulonephritis, and mesangioproliferative  glomerulonephritis |

| **AESI term** |
| --- |
| Novel proven (PCR-based) SARS-CoV-2 infection accompanied by symptoms |
| Novel proven (PCR-based) SARS-CoV-2 positivity without symptoms |
| Novel potential immune mediated condition |
| Formation of granuloma at the injection site |

## **Supplementary Table S5:** Adverse events of special interest (AESI).

Abbreviation: PCR, polymerase chain reaction.

## **Supplementary Table S6:** Characteristics of convalescents after SARS-CoV-2 infection.

| **Characteristics** | **ELISPOT** | | | **ICS** |
| --- | --- | --- | --- | --- |
| **CoVac-1** | **cross-reactive**  **EC** | **SARS-CoV-2-specific EC** | **CoVac-1** |
| Samples – n | 24 | 27 | 26 | 19 |
| Age range – n (%) |  |  |  |  |
| 21 - 40 years | 9 (37.5) | 10 (37) | 8 (31) | 8 (42) |
| 41 - 55 years | 10 (41.7) | 8 (30) | 8 (31) | 8 (42) |
| 56 - 72 years | 5 (20.8) | 9 (33) | 10 (39) | 3 (16) |
| Female – n (%) | 12 (50) | 17 (63) | 15 (58) | 9 (47) |
| Days PCR to sample collection - median (range) | 41 (16 - 48) | 44 (34 - 52) | 45 (34 - 52) | 42 (16 - 48) |
| COVID-19 severity* – n (%) |  |  |  |  |
| Asymptomatic | 11 (46) | 9 (33) | 7 (27) | 9 (47) |
| Symptomatic outpatient | 13 (54) | 18 (67) | 19 (73) | 10 (53) |

Abbreviations: PCR, polymerase chain reaction; EC, epitope composition; ICS, intracellular cytokine staining; *COVID-19 severity categories 1) Asymptomatic: samples collected from individuals without symptomatic disease; 2) Symptomatic outpatient: sample collected from individuals reporting fever (≥ 38.0°C) and subjective disease symptoms.

# References

1. Nelde A, Bilich T, Heitmann JS, et al. SARS-CoV-2-derived peptides define heterologous and COVID-19-induced T cell recognition. Nature immunology 2021;22:74-85.

2. Bilich T, Nelde A, Heitmann JS, et al. T cell and antibody kinetics delineate SARS-CoV-2 peptides mediating long-term immune responses in COVID-19 convalescent individuals. Sci Transl Med 2021;13.

3. Tavares Da Silva F, De Keyser F, Lambert PH, Robinson WH, Westhovens R, Sindic C. Optimal approaches to data collection and analysis of potential immune mediated disorders in clinical trials of new vaccines. Vaccine 2013;31:1870-6.
